# Supplementary material
Source: Springer Nature journal article supplement (https://www.springermedizin.de/resource/supplementary/12876_2006_185_MOESM3_ESM.pdf/9438876)

## A. Colon cancer

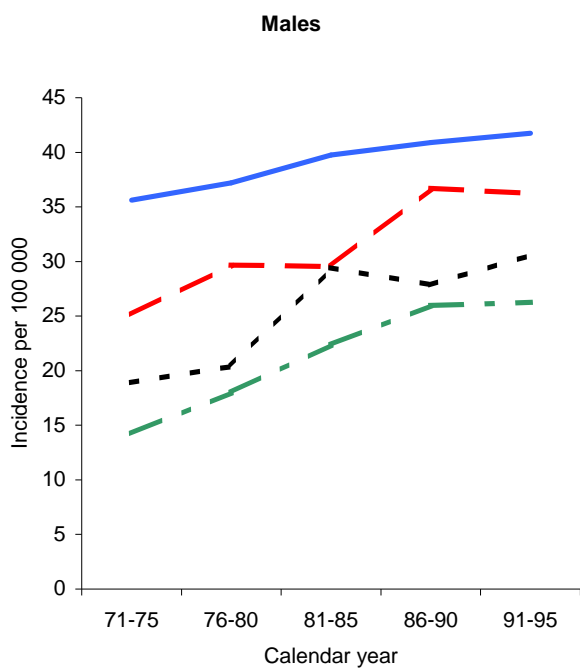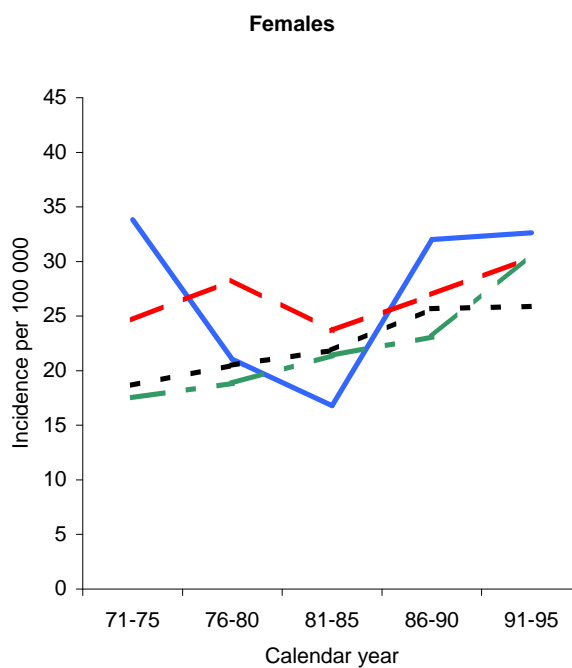

## B. Rectum cancer

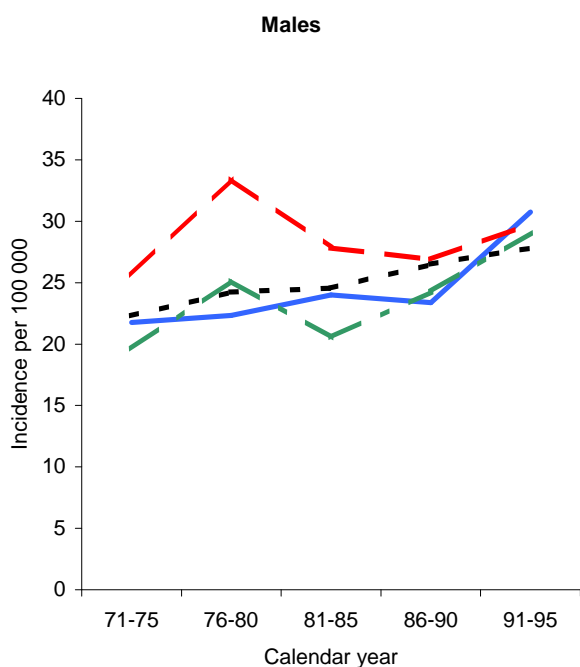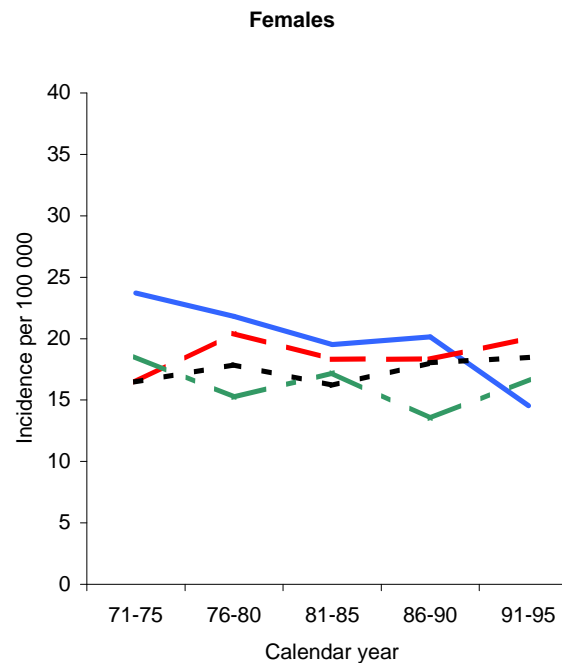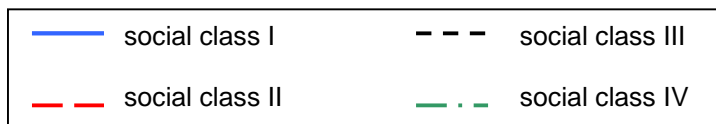

Supplement: MOESM3 [file 9438876]
